# Supplementary material
Source: publisher figshare collection journal article supplement (https://sage.figshare.com/ndownloader/files/24101896)
Supplement: Supplementary file 1 [file 24101896]

participation_number,trauma,age,height,weight,blood_pressure_systolic,blood_pressure_systolic2,blood_pressure_diastolic,blood_pressure_diastolic2,admission_reason,diagnosis,data_collection_form_complete,survey_language_parent,who_did_demographics,relation_to_child,lives_with_parents,age_child,gender_child,ethnicity_child,race_child___1,race_child___2,race_child___3,race_child___4,race_child___5,race_child___6,race_child___7,race_child___8,other_race,birth_loc,length_in_us,child_birth_loc,length_in_us_child,child_trans,rel_stat,adults_house,child_hous,fam_income,pay_health,par_edu,par_class,fam_deport,parent_demographics_complete,survey_language_child,guided_survey,role_model,education_importance,parents_knowme,finish_things,solve_problems,community_help,school_belonging,family_support,friends_support,fair_treatment,skill_development,community_traditions,little_pleasure,feeling_depressed,suicide_attempt,drinks_alcohol,smoke_marijuana,getting_high,intoxicated_driving,drugs_relax,drugs_alone,drugs_forget,drugs_cutdown,drugs_trouble,physical_fight,arrested,gender_identity,other_gender,sexual_orientation,other_sexual_orientation,sexual_partners,condom_use,sti_diagnosis,failed_class,expelled_school,extracurricular,have_mother,parents_swearing,parents_slap,sexual_abuse,no_support,no_food,divorced_parents,mother_hurt,athome_alcoholic,mental_illness,family_prison,adolescent_survey_complete
1,3,17,160,51.8,114,115,75,79,rule out sepsis,back pain,2,1,2,2,,17,2,1,1,0,0,0,0,0,0,0,,2,4,2,4,1,3,6,4,2,1,3,1,2,2,1,0,3,5,5,5,5,5,3,5,5,5,5,5,4,2,2,1,1,2,1,2,2,2,2,2,2,1,,,,,2,3,2,1,2,1,1,2,2,2,2,2,2,2,2,2,1,2
2,1,14,175.26,67,123,123,63,73,Motor vehicle collision,Acute comminuted depressed fracture of the left frontal + left temporal bone w/ underlying epidural hematoma contusion in right upper lobe,2,1,2,2,,13,1,2,0,1,0,0,0,0,0,0,,1,,1,,2,1,3,1,8,2,5,2,2,2,1,1,3,4,5,5,5,5,3,5,5,5,5,4,4,2,2,2,2,2,2,2,2,2,2,2,1,1,,,,,1,1,2,2,2,2,1,2,2,2,2,2,2,2,2,2,1,2
3,2,15,167.5,112.8,120,125,64,73,abdominal pain,acute appendicitis,2,1,2,1,,15,1,1,0,0,0,0,0,0,0,0,,2,4,1,,2,1,3,2,5,1,1,2,2,2,1,0,5,5,5,4,5,3,5,5,5,5,5,4,1,1,2,2,2,2,2,2,2,2,2,2,1,1,,,,,1,1,2,2,2,2,1,2,2,2,2,2,2,2,2,1,2,2
4,3,17,165.1,52.4,129,129,74,74,left ankle pain,acute left calcaneal fracture and soft tissue swelling,2,2,2,2,,17,1,1,0,0,0,0,0,0,1,0,Hispanic,1,,1,,1,6,3,1,2,4,1,2,3,2,1,0,3,4,5,5,5,3,4,5,4,5,3,3,1,1,2,2,2,2,2,2,2,2,2,2,2,1,,,,,1,1,2,,1,1,1,2,2,2,2,2,1,2,2,2,2,2
5,2,15,157.5,59.2,117,112,65,65,fever,acute pyelonephritis,2,2,2,2,,15,2,1,1,0,0,0,0,0,0,0,,1,,1,,1,1,3,3,2,1,1,2,2,2,1,0,5,4,5,5,5,3,5,5,5,5,4,5,1,1,2,2,2,2,2,2,2,2,2,2,1,1,,,,,2,2,2,1,2,1,1,2,2,2,2,2,2,2,2,2,2,2
6,2,14,165,56.4,114,105,75,69,"multiple lymph nodes, rapid increased growth, and breast mass",lymphadenopathy,2,1,2,2,,14,2,2,1,0,0,0,0,0,0,0,,1,,1,,2,1,3,1,4,1,4,1,2,2,1,0,5,5,5,5,5,5,5,5,5,5,4,4,1,5,2,2,2,2,2,2,2,2,2,2,1,1,,,,,1,1,2,2,2,2,1,2,2,2,2,2,2,2,2,2,2,2
7,2,13,170,59.6,129,122,82,78,abdominal pain and nausea,"acute lymphoblastic leukemia, abdom/headache/nausea resolved",2,2,2,2,,,1,1,0,0,0,0,0,0,0,1,,1,,1,,1,3,5,4,2,1,3,2,2,2,1,0,5,5,5,4,5,2,5,5,5,5,5,4,5,1,2,2,2,2,2,2,2,3,3,3,1,1,,,,,1,1,2,1,2,2,1,2,2,2,2,2,1,2,2,2,2,2
8,2,12,154.9,42.6,116,103,69,59,abdominal pain,appendicitis - acute,2,1,2,2,,12,2,1,0,0,0,0,0,0,0,0,,1,,1,,2,1,2,7,6,1,3,2,2,2,1,0,4,6,5,2,6,5,5,5,5,4,6,4,1,1,2,2,2,2,2,2,2,2,2,2,1,1,,,,,1,1,2,2,2,1,1,2,2,2,2,2,2,2,2,2,1,2
9,2,16,172,77.8,131,130,79,71,planned admit for right lower extremity tibial steotomy (achondroplasia),achondroplasia,2,1,2,2,,16,1,1,1,0,0,0,0,0,0,0,,2,4,1,,2,1,5,1,2,1,1,2,2,2,1,0,2,5,5,3,5,1,3,4,3,3,2,2,3,1,2,2,2,2,2,2,2,3,3,2,1,1,,,,,1,1,3,2,2,1,1,2,2,2,2,2,2,2,2,2,2,2
10,2,15,171.5,76.4,122,118,83,72,scheduled chemotherapy,high risk precursor - B-cell acute lymphoblastic leukemia,2,2,2,2,,,1,1,1,0,0,0,0,0,0,0,,1,,1,,1,1,2,3,1,1,1,2,2,2,1,0,5,5,5,4,5,5,5,5,5,5,5,4,1,1,2,2,2,2,2,2,2,2,2,2,1,1,,,,,2,2,2,,2,2,1,2,2,2,2,2,2,2,1,2,2,2
11,3,15,163,60,127,122,66,67,left arm injury,colles fracture in left wrist,2,1,2,2,,15,2,1,1,0,0,0,0,0,0,0,,2,4,1,,2,1,2,3,5,2,1,1,2,2,1,0,5,5,3,5,5,2,6,2,5,6,5,6,1,1,2,2,2,2,2,2,2,2,2,2,1,1,,,,,1,1,2,2,2,3,1,1,2,2,1,2,2,2,2,2,2,2
12,1,24,180,70,129,128,77,79,auto vs bicycle (unhelmeted),"degloving injury penis, urethral injury, injury of soft tissue",2,1,1,,2,24,1,1,0,0,0,0,0,0,0,0,,2,4,1,,2,4,1,3,7,1,4,2,2,2,1,0,1,3,5,2,5,1,2,2,2,2,4,5,1,1,2,1,2,2,2,2,2,2,2,2,1,1,2,,1,,4,2,2,1,1,2,1,1,1,1,2,2,1,2,2,2,2,2
13,2,18,162.5,53.4,128,119,73,69,scheduled admission for chemotherapy,"acute lymphoid leukemia in remission, acute-on-chronic renal impairment, thrombocytopenia, rhinocerebral mucormycosis, anemia",2,1,1,,1,18,1,1,1,0,0,0,0,0,1,0,hispanic,1,,1,,2,1,2,4,3,1,2,2,2,2,1,0,2,3,5,5,4,1,5,5,5,5,5,3,3,1,2,2,1,2,2,2,2,2,2,2,1,1,2,,1,,2,2,2,1,2,2,1,2,2,2,2,2,1,2,1,2,2,2
14,1,23,180.34,75.3,145,143,81,83,"multiple stab wounds to face, left upper extremities, and left chest","stab wounds, pneumothorax",2,1,1,,1,23,1,2,0,1,0,0,0,0,0,0,,2,4,1,,2,4,2,6,8,1,5,3,2,2,1,1,4,5,4,5,4,4,5,5,5,3,5,5,2,1,2,1,1,1,1,1,1,1,1,1,2,1,2,,1,,4,2,2,1,1,3,1,2,2,2,2,2,1,2,1,2,2,2
15,2,19,172.7,90.5,120,109,76,67,scheduled chemotherapy,ALL,2,1,1,,1,19,1,1,0,0,0,0,0,0,0,1,,2,4,1,,1,1,2,3,10,1,1,2,2,2,1,0,4,3,5,3,5,4,6,4,4,5,3,4,1,1,2,1,1,1,1,1,2,1,1,1,1,1,2,,1,,1,1,2,1,1,1,1,2,2,2,2,2,1,2,2,2,1,2
16,2,20,172,66.3,131,131,72,71,pain in tooth,"dental abscess, facial cellulitis",2,1,1,,2,20,1,2,0,1,0,0,0,0,0,0,,2,4,2,1,2,1,25,10,10,1,2,4,2,2,1,0,5,2,5,5,5,2,6,5,1,1,5,5,2,2,2,2,2,2,2,2,2,2,2,2,2,1,2,,1,,3,2,2,2,2,1,1,2,2,2,2,2,1,2,2,2,2,2
17,2,18,164,115.3,111,114,62,50,fever,"neutropenic fever, ALL",2,1,1,,1,18,1,1,0,0,0,0,0,0,1,0,,2,4,1,,1,1,2,4,5,1,1,2,2,2,1,0,4,5,3,4,6,3,5,5,5,4,5,3,2,1,2,2,2,2,2,2,2,3,3,3,1,1,2,,1,,1,1,2,2,2,2,1,2,2,2,2,2,2,2,2,2,2,2
18,1,20,177.8,60,130,134,79,91,MVC - head on collision,intracranial hemorrhage,2,1,1,,1,20,1,2,0,0,1,0,0,0,0,0,,2,3,2,3,1,1,2,2,5,1,5,3,2,2,1,0,3,4,4,4,3,5,4,4,4,3,5,3,2,1,2,1,1,3,1,2,2,2,2,1,1,1,2,,1,,2,2,2,1,2,1,2,2,2,2,2,2,2,2,2,2,2,2
19,2,19,157.48,80.45,116,106,63,55,RUQ abdominal pain,"hepatitis, poisoning by acetaminophen, vomiting  ",2,1,1,,2,19,2,1,0,0,0,1,0,0,0,0,,1,,1,,2,3,8,5,1,1,2,1,2,2,1,0,5,5,2,2,2,3,3,4,1,5,3,4,3,2,2,1,1,1,2,1,1,1,1,1,3,3,1,,1,,4,3,1,1,2,2,1,2,2,1,1,2,1,2,2,1,2,2
20,2,23,158,191,137,158,71,77,code: (5150) police said grave disability/danger to self,"neglect, hepatic steatosis, intellectual disability, intertrigo, menorrhagia",2,1,1,,1,23,2,1,1,0,0,0,0,0,0,0,,1,,1,,2,7,7,2,10,4,9,1,3,2,1,0,1,2,6,2,1,2,1,2,3,2,2,2,1,2,2,2,2,2,2,2,2,2,2,2,2,1,1,,1,,1,1,2,2,2,1,1,1,2,1,1,2,1,2,2,2,2,2
21,2,25,152,62,137,136,92,90,"fever, chills, dysuria, flank pain",sepsis,2,1,1,,1,25,2,1,0,0,0,0,0,0,1,0,Mexican,2,4,2,4,2,4,4,3,1,1,1,2,1,2,1,0,3,5,5,4,4,5,6,5,1,3,3,1,2,2,2,1,2,1,1,1,1,1,1,1,3,3,1,,1,,5,3,1,1,1,1,1,2,2,2,1,2,1,2,1,2,2,2
22,2,24,164,57,99,95,46,53,syncope,unknown,2,1,1,,1,24,1,1,0,0,0,0,0,1,0,0,,1,,1,,1,2,3,0,1,1,8,1,2,2,1,0,5,5,4,2,1,5,2,5,2,5,5,2,2,1,2,2,2,2,2,2,2,2,3,2,1,1,6,,5,,1,1,2,2,2,1,1,3,2,2,2,2,2,2,2,2,2,2
23,2,25,160,63.3,121,111,61,67,4 days RUQ and epigastric pain,cholelithiasis,2,2,1,,2,25,2,1,0,0,0,0,0,0,0,0,,2,3,2,3,3,2,2,2,1,1,2,2,2,2,2,0,2,4,1,4,4,1,6,4,4,1,3,4,2,1,2,2,2,2,2,2,2,2,3,2,1,3,1,,5,,2,3,2,2,2,1,1,1,1,2,2,2,1,1,2,2,2,2
24,2,18,160,101.1,130,127,82,72,chest pain/upper abdominal pain,gallstones in gallbladder,2,1,1,,1,18,2,1,0,0,0,0,0,0,1,0,Salvadorian,2,4,2,4,1,3,2,2,4,1,1,3,2,2,1,0,4,5,5,5,5,5,5,4,4,3,5,3,1,1,2,1,2,2,2,2,2,2,2,2,1,1,1,,1,,2,3,2,2,2,3,1,2,2,2,2,2,1,1,1,2,1,2
25,2,21,168.5,54.8,148,126,108,75,abdominal pain,acute kidney rejection vs pyelonephritis,2,1,1,,1,21,1,1,0,0,0,0,0,0,1,0,,2,3,1,,1,1,3,3,7,1,4,2,2,2,1,0,5,5,5,5,5,5,5,5,5,5,5,5,1,1,2,2,2,2,2,2,2,2,2,3,1,1,2,,1,,4,2,2,2,2,2,1,2,2,2,2,2,2,2,2,2,2,2
26,1,18,167,71.7,156,151,67,89,motorcycle accident,"trauma to spleen, contusions, lacerations",2,1,1,,1,18,1,1,1,0,0,0,0,0,0,0,,2,4,1,,1,1,1,0,10,1,2,3,2,2,1,0,4,3,5,5,5,1,1,5,5,4,3,4,3,1,2,2,2,2,2,2,2,2,2,2,1,1,2,,1,,2,2,2,1,2,2,2,2,2,2,2,2,1,2,2,2,2,2
27,2,24,182,88.6,121,120,64,64,right knee pain and swelling,cellulitis ,2,1,1,,2,24,1,1,0,0,0,0,0,0,1,0,Mexican,2,4,2,4,1,1,2,3,10,2,2,2,2,2,1,0,2,5,5,4,5,4,6,3,4,3,4,6,1,2,2,2,2,2,2,2,2,3,3,3,1,2,2,,1,,3,3,2,1,2,4,1,2,2,2,2,2,1,1,1,2,1,2
28,1,24,175,85,132,132,85,78,motorcycle accident,motorcycle accident,2,1,1,,2,24,1,1,0,0,0,1,0,0,0,0,,1,,1,,2,3,2,5,10,1,2,2,2,2,1,0,2,2,1,4,5,3,1,3,5,3,5,5,2,3,2,1,1,1,1,1,1,2,1,2,2,3,2,,5,,4,2,2,1,1,1,2,2,2,2,2,2,1,1,1,2,2,2
29,2,21,149.8,63.5,102,103,68,67,abdominal pain,abdominal pain,2,1,1,,1,21,2,1,0,0,0,0,0,0,0,1,,2,2,1,,1,5,3,2,1,1,2,2,2,2,1,0,3,3,2,2,1,1,6,5,5,3,4,1,2,2,2,2,2,2,2,2,2,2,2,2,1,2,1,,1,,2,2,2,2,2,2,1,1,2,2,1,2,2,2,2,2,1,2
30,2,20,158,88.2,182,194,119,120,"abdominal pain, nausea/vomiting, diarrhea","systemic lupus, acute hyperkalemia",2,1,1,,1,20,2,1,0,0,0,0,0,0,1,0,Mexican,2,4,2,4,1,7,2,2,10,1,2,2,2,2,1,0,5,5,5,5,5,5,3,5,3,5,5,5,3,2,2,2,2,2,2,2,2,2,2,2,1,1,1,,1,,1,1,2,1,2,2,1,2,2,2,2,2,2,2,2,2,2,2
31,2,25,185.4,174.4,120,108,74,68,scheduled chemotherapy,Ewing's sarcoma of bone,2,1,1,,1,25,1,1,0,0,0,0,0,0,0,1,,2,4,1,,1,2,2,1,2,1,9,3,2,2,1,0,3,3,5,5,5,5,1,5,5,5,5,5,3,1,2,2,1,2,1,2,1,2,2,2,1,3,2,,1,,4,2,2,1,2,1,1,1,1,2,2,1,1,1,2,2,2,2
33,1,22,170,66,149,146,75,96,motorcycle accident,MVA trauma unspecified fracture of RL leg,2,1,1,,1,22,1,2,1,0,0,0,0,0,0,0,,1,,1,,2,3,2,4,7,4,5,3,2,2,1,0,2,5,5,4,5,3,3,5,5,3,5,4,1,1,2,2,1,2,1,1,1,2,2,2,1,1,2,,5,,4,2,2,2,2,2,1,2,2,2,2,2,1,2,2,1,2,2
35,2,21,157,60.8,108,103,73,67,scheduled chemotherapy,synovial sarcoma,2,2,1,,2,21,2,1,0,0,0,0,0,0,0,0,,2,3,2,2,3,4,2,2,10,1,8,3,2,2,2,0,3,4,4,4,4,2,2,3,3,4,3,3,2,1,2,2,2,2,2,2,2,2,1,2,1,1,1,,1,,3,2,2,2,1,1,1,2,2,2,3,2,2,2,2,2,2,2
36,2,21,152,82,143,136,93,90,abdominal pain,systemic inflammatory response syndrome,2,1,1,,1,21,2,1,0,0,0,0,0,0,0,1,,2,4,1,,2,1,2,2,5,1,2,2,2,2,1,0,5,5,4,5,5,3,4,5,5,4,5,3,3,2,2,1,2,2,2,2,2,2,2,1,1,1,1,,1,,3,3,2,1,2,1,1,2,2,2,2,2,2,2,2,2,2,2
37,1,24,172,68.4,122,117,76,80,Pedestrian hit by car,"pubic fractures, sacral fractures, scapula fracture, L5 transverse process fracture",2,1,1,,1,24,2,1,0,0,0,0,0,0,1,0,Cuban,1,,1,,1,2,4,3,2,1,2,2,2,2,1,0,3,5,5,5,5,3,3,5,5,5,5,5,4,1,2,1,1,1,1,1,1,2,1,2,3,2,1,,1,,3,3,2,2,1,3,1,2,2,1,2,2,2,2,2,2,1,2
38,2,21,160,53.2,117,114,53,61,"1 week fevers, rt face swelling",SLE c/b class V nephritis,2,1,1,,1,21,2,2,0,1,0,0,0,0,0,0,,1,,1,,2,4,2,1,1,1,2,2,2,2,1,0,2,5,5,4,5,5,5,4,4,5,4,4,4,3,2,2,2,2,2,2,2,2,2,2,1,1,1,,1,,3,2,2,1,1,1,1,2,2,2,2,2,1,2,2,2,2,2
39,1,18,149.86,72.4,127,114,79,65,mult. stab wounds,stab wound,2,1,1,,1,18,2,1,1,0,0,0,0,0,0,0,,1,,2,4,2,1,3,2,3,1,2,2,2,2,1,1,4,5,4,2,2,3,1,5,5,3,5,1,2,1,2,1,2,2,1,2,2,2,2,1,1,1,1,,1,,2,3,2,1,2,1,2,2,2,2,1,2,2,2,2,2,1,2
40,1,22,165.1,52.1,123,113,89,79,Dog bite,Deep space abscess,2,1,1,,2,22,2,2,0,0,0,0,0,1,0,0,,1,,1,,2,1,2,2,,1,4,2,2,2,1,0,4,4,3,4,4,3,3,3,4,3,2,3,2,3,2,1,1,1,1,1,1,1,2,2,1,2,1,,2,,4,3,2,1,2,2,1,3,2,2,2,2,2,2,1,2,1,2
41,1,25,173.35,85,144,137,92,85,skill saw injury,laceration to 2nd/3rd digits,2,2,1,,2,25,1,1,0,0,0,0,0,0,0,1,,2,4,2,3,2,1,2,4,2,1,3,2,2,2,2,0,5,5,3,5,5,3,1,5,3,3,3,3,2,1,2,2,2,2,2,2,2,2,2,2,1,3,1,,1,,4,3,2,3,2,1,2,2,2,2,2,2,1,2,2,2,2,2
42,1,21,170.18,73,128,125,76,62,motorcycle crash,"subdural hematoma, bifrontal contusions, skull fractures",2,1,1,,1,21,1,1,1,0,0,0,0,0,0,0,,2,4,1,,2,1,2,2,6,1,2,2,2,2,1,0,3,,5,4,4,3,6,5,1,4,4,3,2,5,2,1,2,2,1,2,2,2,3,2,1,3,2,,1,,6,2,2,2,2,1,1,2,2,2,2,2,2,2,2,2,2,2
43,2,22,157,46.1,97,85,50,45,follow-up,lupus,2,2,1,,1,22,2,1,1,0,0,0,0,0,0,0,,2,4,2,2,2,6,2,6,1,1,1,2,2,2,2,1,5,5,5,5,5,5,6,5,5,5,5,5,2,2,2,2,2,2,2,2,2,2,2,2,1,1,1,,1,,2,2,2,2,2,1,1,2,2,1,1,1,2,2,2,2,2,2
44,2,20,167,120.2,136,135,72,63,intentional acetaminophen overdose,acetaminophen overdose,2,1,1,,1,20,1,1,1,0,0,0,0,0,0,0,,2,4,1,,1,4,2,1,10,4,2,2,2,2,1,0,2,5,2,2,2,1,1,2,1,1,1,1,1,4,1,1,1,1,1,1,1,1,1,1,2,3,2,,1,,4,3,2,1,1,1,1,1,1,1,1,1,1,1,1,2,2,2
45,1,24,165,66.5,122,121,71,77,fall,multiple fractures; right pneumothorax,2,1,1,,2,24,2,2,0,0,0,1,0,0,0,0,,1,,2,,2,1,1,13,,2,3,2,2,2,1,0,2,5,5,5,1,3,4,5,5,5,5,5,1,3,2,1,1,1,2,1,2,1,1,1,3,2,1,,4,interested in humans,2,3,2,1,2,2,2,1,2,1,2,2,1,2,1,1,1,2
46,2,23,167.6,60.2,108,104,63,65,decrease vision in right eye,brain mass,2,1,1,,1,23,2,1,0,0,0,0,0,0,1,0,Hispanic,1,,2,4,1,1,2,4,1,1,4,2,2,2,1,0,5,5,5,5,1,4,2,5,5,5,5,4,3,2,2,2,2,2,2,2,2,2,1,2,1,1,1,,1,,3,2,2,2,2,1,1,2,2,2,2,2,2,2,2,2,2,2
47,2,22,158,42.1,136,128,101,91,abdominal pain,diabetic ketoacidosis,2,1,1,,1,22,2,2,0,1,0,0,0,0,0,0,,1,,1,,2,4,2,3,10,1,2,1,2,2,1,0,3,5,5,5,1,3,3,3,3,5,3,3,2,2,2,2,2,2,1,2,2,2,2,2,1,1,1,,1,,2,2,2,1,2,1,1,2,2,2,1,2,2,2,2,2,2,2
48,1,23,163,72.4,148,133,76,68,motor vehicle collision,subarachnoid hemorrhage,2,1,1,,2,23,2,1,0,0,0,0,0,0,0,1,,2,3,1,,2,2,3,10,,1,2,2,2,2,1,0,5,5,3,5,3,2,3,5,5,5,5,3,3,1,2,1,2,2,2,2,2,2,2,1,1,3,1,,1,,2,2,2,2,2,2,1,2,2,2,2,2,1,2,2,2,1,2
49,2,23,166,64,116,106,55,53,abdominal pain,liver tumor,2,1,1,,1,23,1,1,0,0,0,1,0,0,0,0,,1,,1,,1,4,4,2,5,1,2,2,2,2,1,0,3,5,5,4,4,3,2,3,4,5,4,4,,1,2,1,1,2,1,1,1,2,1,2,1,1,6,,5,,4,2,2,1,1,2,1,2,2,2,2,2,1,3,2,2,2,2
50,2,23,160,61.6,107,105,71,63,headache,"intracerebral hemorrhage, arteriovenous malformation",2,2,1,,1,23,2,1,0,0,0,0,0,0,0,1,,2,4,2,4,2,2,2,5,1,1,1,2,2,2,2,1,3,5,5,5,5,5,6,5,1,3,5,5,2,1,2,2,2,2,2,2,2,2,2,2,1,1,1,,1,,2,3,2,2,2,1,1,2,2,2,2,2,2,2,2,2,2,2
51,2,21,180.3,59.1,132,130,77,82,maxillary hypoplasia,asymmetry of maxilla,2,1,1,,1,21,1,1,1,0,0,0,0,0,0,0,,2,4,1,,2,1,2,3,4,1,2,3,2,2,1,0,5,5,4,5,5,4,4,5,4,5,5,5,2,2,2,2,2,2,2,2,2,2,2,2,1,1,2,,1,,1,1,2,1,1,2,1,2,2,2,2,2,2,2,2,2,1,2
52,2,20,162,58.5,116,113,70,72,persistent cough and imaging findings,tuberculosis,2,1,1,,1,20,2,1,0,0,0,0,0,0,0,1,,2,4,1,,2,1,2,3,3,1,1,2,2,2,1,0,5,5,5,5,5,3,5,5,5,5,5,4,1,1,2,2,2,2,2,2,2,2,2,2,1,1,1,,1,,2,2,2,1,2,3,1,2,2,2,2,2,2,2,2,2,2,2
53,2,21,157.48,62.8,124,121,67,71,breast abscess,breast abscess,2,1,1,,1,21,2,1,0,0,0,0,0,0,1,0,Mexican,3,,2,4,1,1,4,5,10,1,1,2,2,2,1,0,6,3,3,3,2,6,1,3,3,6,1,1,1,2,2,2,2,2,2,2,2,2,2,2,1,2,1,,3,,3,3,2,1,1,1,1,2,2,1,3,2,1,2,1,2,1,2
54,2,22,152.4,45.5,202,199,136,50,Cold sore,ESRD,2,1,1,,2,22,2,1,0,0,0,0,0,0,1,0,Hispanic,2,4,1,,2,4,2,4,,1,2,2,2,2,1,0,2,5,3,5,4,5,5,3,1,4,4,4,2,3,2,2,2,2,2,2,2,1,1,2,3,1,1,,1,,3,3,2,1,1,1,1,2,2,1,2,2,1,1,1,1,1,2
55,2,24,177,94.3,134,117,76,68,Chemotherapy,Seminoma,2,1,1,,2,24,1,1,0,0,0,0,0,0,1,0,Mexican,2,4,1,,1,3,5,0,5,1,1,2,2,2,1,0,2,4,5,4,2,3,1,2,2,3,4,2,2,2,2,2,2,2,2,2,2,2,2,2,3,3,2,,1,,5,2,2,2,1,2,1,1,1,2,1,1,1,1,2,1,2,2
56,2,22,162,62,123,130,78,71,Shortness of breath,Asthma,2,1,1,,2,22,2,1,0,0,0,0,0,0,1,0,,2,3,2,3,2,3,2,2,3,1,5,2,2,2,1,0,1,3,2,2,3,5,3,3,3,2,3,3,2,3,2,1,1,1,1,1,1,2,2,1,3,2,1,,2,,2,3,2,1,3,2,3,1,1,2,2,2,2,2,2,1,2,2
57,1,23,180,54,138,138,68,87,Multiple GSW,Gunshot wounds,2,1,1,,1,23,1,1,0,0,0,0,0,0,1,0,Mexican American,3,,1,,1,4,2,1,10,1,1,1,2,2,1,0,3,5,5,5,5,3,6,5,2,4,5,3,4,1,2,1,1,1,1,1,3,2,2,2,1,2,2,,1,,5,2,2,1,2,1,1,2,2,2,3,1,1,2,2,2,2,2
58,2,20,155,88,100,105,53,60,RUQ pain,gallstones,2,1,1,,2,20,2,1,0,0,0,0,0,0,0,0,,2,4,1,,2,1,4,3,3,1,2,2,2,2,1,0,5,5,5,5,5,5,4,5,5,3,5,3,2,1,2,2,2,2,1,2,2,2,2,2,1,1,1,,1,,2,2,2,1,2,1,1,2,2,2,2,2,2,2,2,2,2,2
59,2,19,164,104.5,116,114,70,60,pain from kidney stones,nephrolithiasis,2,1,1,,1,19,2,1,1,0,0,0,0,0,0,0,,2,4,1,,1,1,2,4,2,1,2,2,2,2,1,0,5,5,5,4,5,5,5,5,5,5,5,5,4,1,2,2,2,2,2,2,2,2,2,2,1,1,1,,1,,1,1,2,1,2,2,1,2,2,2,1,2,2,2,2,2,2,2
60,2,20,164,78.5,122,110,76,77,"cough, fevers, flank pain","sepsis, fever, SOB",2,1,1,,1,20,2,1,1,0,0,0,0,0,0,0,,1,,1,,2,5,2,5,5,1,2,1,2,2,1,0,5,5,5,5,4,5,4,3,1,5,5,5,4,4,1,2,1,2,2,2,2,2,2,2,1,1,1,,3,,4,2,2,1,2,1,1,1,1,2,1,2,2,2,1,2,2,2
61,2,18,,58.8,122,122,80,88,Nausea + Vomiting,"dehydration, depression",2,1,1,,1,18,2,1,0,0,0,1,0,0,0,0,,1,,1,,1,6,4,4,10,1,2,2,2,2,1,0,4,5,2,4,1,5,2,5,5,5,4,5,4,4,2,2,1,2,2,2,2,2,2,2,1,1,1,,1,,2,2,2,1,2,2,2,2,2,2,2,2,2,2,2,2,2,2
62,1,24,158,118,98,96,60,56,MVC,"MVC, hangman fracture",2,1,1,,1,24,2,1,0,0,0,0,0,0,1,0,,1,,1,,1,4,3,7,2,1,2,1,2,2,1,0,2,4,3,4,2,1,1,2,1,4,3,2,4,4,2,1,1,1,1,1,1,2,1,1,1,3,1,,1,,2,3,2,1,1,1,1,1,1,2,1,2,1,2,1,2,2,2
63,1,23,177.8,98.6,118,119,72,77,Multiple GSW,"ascending colon injury, transverse colon injury, injury of small bowel, fracture of femoral shaft",2,1,1,,1,23,1,1,0,0,0,0,0,0,1,0,,2,4,1,,1,4,1,3,10,1,8,1,2,2,1,0,3,3,5,4,1,4,3,5,5,5,4,5,3,4,2,1,2,2,1,2,2,2,1,1,3,3,2,,1,,3,3,2,1,1,1,1,2,2,2,2,2,2,2,1,2,2,2
64,2,25,152.4,75.7,138,134,85,98,Joint pain and headache,SLE flare,2,1,1,,1,25,2,1,0,0,0,0,0,0,0,0,,2,4,2,4,1,1,4,1,10,1,1,2,2,2,1,0,2,5,1,4,5,1,1,5,5,3,2,5,4,1,2,2,2,2,2,2,2,2,2,2,1,1,1,,1,,2,2,2,2,2,1,1,2,2,2,2,2,2,2,2,2,2,2
65,1,24,165,55.6,116,115,73,65,Automobile vs. bicycle collision,"Closed pelvic fracture, scalp laceration, open knee joint, rib fracture",2,1,1,,1,24,1,1,1,0,0,0,0,0,0,0,,1,,1,,1,3,2,2,2,1,2,1,2,2,1,0,2,6,2,3,3,2,5,5,5,5,3,2,2,4,2,1,2,2,1,,1,3,1,1,,,,,5,,,,2,1,2,1,1,2,1,1,2,1,3,2,2,2,2,2
66,2,24,182,105,132,134,60,69,Abdominal pain,Acute liver injury,2,1,1,,1,24,1,1,0,0,0,0,0,0,1,0,Hispanic,2,4,1,,1,1,2,3,6,3,2,2,2,2,1,0,2,5,5,5,5,3,3,5,4,5,5,4,3,1,2,2,2,2,2,2,2,2,2,2,1,1,2,,1,,4,2,2,2,1,1,1,2,2,2,2,2,2,2,2,2,2,2
67,2,21,157,55,101,107,66,65,Fever,Neutropenic fever,2,1,1,,1,21,1,1,1,0,0,0,0,0,0,0,,2,4,2,4,1,1,2,2,3,1,1,2,2,2,1,0,5,5,5,5,5,1,5,5,5,6,5,5,5,1,2,2,2,2,2,2,2,2,2,2,1,1,2,,1,,3,2,2,1,2,1,1,2,2,2,2,2,2,2,2,2,2,2
68,1,24,172.72,70.1,112,118,73,76,skateboarding accident,"closed malleolous fracture, knee pain swelling, open fracture",2,1,1,,2,24,1,2,1,0,0,0,0,0,0,0,,1,,1,,3,6,2,4,10,1,4,4,2,2,1,0,4,5,5,5,5,4,1,5,5,4,4,2,4,1,2,3,1,2,2,2,1,2,3,2,1,1,2,,5,,2,3,2,1,1,3,1,2,2,2,2,1,1,2,2,2,2,2
69,1,22,155,80.8,126,121,77,71,auto vs. pedestrian,open fracture of ankle,2,1,1,,1,22,2,1,1,0,0,0,0,0,0,0,,2,4,1,,1,1,2,3,10,1,2,2,2,2,1,0,5,4,5,5,5,3,2,5,3,4,5,4,2,3,2,1,1,2,1,2,2,2,2,2,1,1,1,,1,,3,3,2,2,2,1,1,2,2,2,2,2,2,2,2,2,2,2
70,1,21,165,68,129,128,70,77,mirror lacerated left calf,L. achilles laceration,2,1,1,,1,21,2,1,0,0,0,0,0,0,1,0,hispanic,2,4,1,,1,1,2,2,6,2,1,2,2,2,1,0,1,5,3,3,3,1,4,5,5,5,5,2,1,3,2,1,1,1,1,1,1,2,2,2,1,1,1,,1,,3,3,2,2,2,2,2,2,2,2,2,2,2,2,2,2,2,2
71,2,20,158,51.2,101,98,65,62,Side pain,Vaso-occlusive pain episode (Sickle Cell Anemia),2,1,1,,1,20,1,1,0,0,0,0,0,0,1,0,South American,2,4,2,4,1,1,2,1,10,1,2,3,1,2,1,0,2,4,5,5,5,4,5,4,5,5,5,5,2,2,2,2,2,2,1,2,2,2,2,2,4,1,2,,1,,3,2,2,1,2,3,2,1,1,2,1,2,2,2,1,2,1,2
72,1,22,155,84.5,103,106,57,57,auto vs. pedestrian,MVC open fx of ankle,2,1,1,,1,22,2,1,1,0,0,0,0,0,0,0,,2,4,1,,2,1,2,3,10,1,2,2,2,2,1,0,4,4,5,5,5,4,4,5,4,4,5,4,2,2,2,1,1,2,1,2,2,2,1,2,1,1,1,,1,,3,3,2,1,2,1,1,2,2,2,2,2,2,2,2,2,2,2
73,2,18,180,58.6,121,116,75,70,diarrhea,ulcerative colitis,2,1,1,,1,18,1,1,0,1,0,0,0,0,0,0,,1,,1,,2,6,3,1,4,1,2,3,2,2,1,0,4,5,3,5,5,3,3,2,4,3,5,4,3,2,2,2,2,2,2,2,2,2,2,2,1,1,2,,2,,1,1,2,2,2,3,1,1,1,2,1,1,1,2,1,2,2,2
74,2,23,160,44,110,105,73,74,abdominal pain,Crohn's disease,2,1,1,,2,23,1,2,1,0,0,0,0,0,0,0,,2,4,1,,2,5,2,4,10,1,2,2,2,2,1,0,3,4,2,5,4,1,6,1,4,4,1,3,2,2,2,2,2,1,1,1,1,2,2,2,1,1,2,,1,,3,2,2,2,1,1,3,1,3,2,1,2,2,2,2,2,2,2
